## RESEARCH ARTICLE

# Quantifying error in occurrence data: Comparing the data quality of iNaturalist and digitized herbarium specimen data in flowering plant families of the southeastern United States

Elizabeth White<sup>1,2\*</sup>, Pamela S. Soltis<sup>1,2</sup>, Douglas E. Soltis<sup>1,2</sup>, Robert Guralnick<sup>2</sup>

**1** Department of Biology, University of Florida, Gainesville, Florida, United States of America, **2** Florida Museum of Natural History, Gainesville, Florida, United States of America

\* [elizabethwhite1@ufl.edu](mailto:elizabethwhite1@ufl.edu)

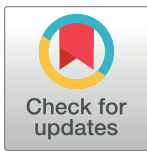

## OPEN ACCESS

**Citation:** White E, Soltis PS, Soltis DE, Guralnick R (2023) Quantifying error in occurrence data: Comparing the data quality of iNaturalist and digitized herbarium specimen data in flowering plant families of the southeastern United States. PLoS ONE 18(12): e0295298. <https://doi.org/10.1371/journal.pone.0295298>

**Editor:** Hong Qin, University of Tennessee at Chattanooga, UNITED STATES

**Received:** May 26, 2023

**Accepted:** November 19, 2023

**Published:** December 7, 2023

**Copyright:** © 2023 White et al. This is an open access article distributed under the terms of the [Creative Commons Attribution License](https://creativecommons.org/licenses/by/4.0/), which permits unrestricted use, distribution, and reproduction in any medium, provided the original author and source are credited.

**Data Availability Statement:** Data is held in a public GitHub repository <https://github.com/ewwhite344/iNatHerb>.

**Funding:** These studies were supported by a National Science Foundation grant (awarded to Douglas Soltis (DS) and Pamela Soltis (PS)) CIBR: Collaborative Research: Integrating data communities with BiotaPhy: a computational platform for data-intensive biodiversity research and training (Award #1930007). The funders had

## Abstract

iNaturalist has the potential to be an extremely rich source of organismal occurrence data. Launched in 2008, it now contains over 150 million uploaded observations as of May 2023. Based on the findings of a limited number of past studies assessing the taxonomic accuracy of participatory science-driven sources of occurrence data such as iNaturalist, there has been concern that some portion of these records might be misidentified in certain taxonomic groups. In this case study, we compare Research Grade iNaturalist observations with digitized herbarium specimens, both of which are currently available for combined download from large data aggregators and are therefore the primary sources of occurrence data for large-scale biodiversity/biogeography studies. Our comparisons were confined regionally to the southeastern United States (Florida, Georgia, North Carolina, South Carolina, Texas, Tennessee, Kentucky, and Virginia). Occurrence records from ten plant families (Gentianaceae, Ericaceae, Melanthiaceae, Ulmaceae, Fabaceae, Asteraceae, Fagaceae, Cyperaceae, Juglandaceae, Apocynaceae) were downloaded and scored on taxonomic accuracy. We found a comparable and relatively low rate of misidentification among both digitized herbarium specimens and Research Grade iNaturalist observations within the study area. This finding illustrates the utility and high quality of iNaturalist data for future research in the region, but also points to key differences between data types, giving each a respective advantage, depending on applications of the data.

## Introduction

The push to deinstitutionalize the acquisition of biodiversity occurrence data has greatly increased the breadth of data made accessible via participatory science initiatives [1–3]. Some of the most popular participatory science data platforms are apps and web-based programs in which users upload records of opportunistically observed living organisms, storing the time

no role in study design, data collection and analysis, decision to publish, or preparation of the manuscript.

**Competing interests:** The authors have declared that no competing interests exist.

and location where the organism was observed (e.g., iNaturalist) [4]. These kinds of occurrence data have been studied and used in a wide variety of published research (e.g., [5–8]), but there is still considerable contention surrounding the quality of participatory science data and how it should be combined with expert-vetted natural history collection data in publishable research [9–12].

### **iNaturalist as a data source**

In iNaturalist, both observations and identifications are user-driven. Within this framework, a “Research Grade” observation is an observation that has more than two thirds of all identifiers agreeing on a species-level identification (with a minimum of two identifiers) [13]. Since 2012, these “Research Grade” observations have been routinely published in the Global Biodiversity Information Facility (GBIF) [14], which is a source of standardized occurrence data from multiple international sources, making these observations widely available for researchers to download and use in combination with other kinds of occurrence data.

Published studies using iNaturalist now cover a wealth of topics similar in scope to the applications of museum specimen data [3, 6, 7, 11, 15, 16]. The recent popularity and ready availability of participatory science data have also prompted researchers to develop protocols for the use of these data in various research applications, given a presumed higher level of “noise” in iNaturalist data that requires further filtering as compared to collections-based data [17].

Since the term “citizen science” (referred to here as “participatory science”, [18]) was coined in 1989 [19], there has been contention regarding metrics of data quality and accuracy of participatory science data. Recent studies have found moderate levels of misidentification in iNaturalist data, which has made researchers cautious of using participatory science data as a whole. McMullin [20] found that species that require microscopy or chemistry to make taxonomic distinctions most likely will not have the information required to make proper species delineations from participatory science observations, unless there are subtle morphological differences that allow species to be delimited without reference to the typical diagnostic characters. The latter approach still requires a priori knowledge of the taxonomy and biology of the organismal group and is less of a quantifiable process on a large scale.

### **Museum collection data and herbarium digitization**

With technological advances and rapid digitization, massive amounts of natural history collection data are available for aggregation and use in research. Herbaria in particular are crucial to the study and conservation of plants, as having a physical plant specimen preserved allows for fine-scale standardized morphological assessments, the possibility of using tissue for genetic study, and a variety of other advantages to research [21–23].

Studies assessing bias in the use of natural history collections have found issues not dissimilar to the concerns raised by some regarding participatory science data [24–27]. Possible biases include an overrepresentation of rare species [28], selective focus on certain groups or families depending on herbarium staff specialization, bias in collection locality (e.g., closer to cities or universities) [23, 29], and temporal biases associated with a general decline in botanical collections made in the last 100 years [30, 31].

iDigBio is a data aggregator that has been storing and serving digitized natural history collections and data since 2011 and today is a massive repository of occurrence data, with nearly 140 million digital records [32–34]. iDigBio, and other large data aggregators such as GBIF, are used often as a source of species occurrence data to perform large biodiversity analyses.

Unlike GBIF, however, iDigBio does not incorporate participatory science data (such as iNaturalist observations).

Digitization of herbarium specimens has opened up a wealth of opportunities in the application and accessibility of herbarium data [21, 22]. Efforts to standardize the image format of digitized specimens [35] has improved their value for morphological studies. The use of digitized herbarium specimens in informing AI-driven models for plant identification, morphological, and phenological studies is of particular note [36–40], but having a better idea of the taxonomic error rates in varying groups of plants before using these models will be of utmost importance as a model informed by misidentified specimens could perpetuate bias and incorrect information [24]. Additionally, previous studies have assessed herbarium images by themselves on a large scale and found some complexity regarding taxonomic identification and accuracy, largely cases of outdated taxonomy, but in some cases misspellings or misidentifications [41].

## Present study

Advocates for the use of participatory science occurrence data argue that they provide a wealth of additional information that is often comprehensive and more current than natural history collection data [3, 6, 7, 42, 43], while skeptics raise issues regarding the potential inaccuracy of non-expert identification [10, 12, 13]. This study provides a direct comparison of the two kinds of data (participatory science vs. natural history collection) to permit a better understanding of both, as well as insights into if and where they differ in quality. Our study explores the limitations of using images as a data source to a novel extent and scale and provides insight into the processes of botanical taxonomic identification when only images are available.

In this study, digitized herbarium specimens were used as a proxy for herbarium specimens as a whole for the purposes of standardization of the image identification process. Numerous caveats related to this decision are addressed in more detail in the Discussion. Broadly, this decision emphasizes both the unique nature of the iNaturalist platform in that it operates solely on image identification, but also stresses the importance of incorporating ample images of distinguishing features into the standard herbarium digitization protocol moving forward, if the goal is ultimately to make these kinds of data comparable at large scales.

Recently published studies have investigated the quality of solely iNaturalist identification [13, 44]; here, we aim to provide a direct comparison of the proportion of misidentified observations by assessing iNaturalist and digitized herbarium data side by side. iNaturalist identification errors have been assessed in other studies, but these studies were either at smaller scales than our study or did not make any comparisons with digitized herbarium data [13]. We confine our scope to a case study among vascular plant families in the southeastern U.S. (confined by a bounding box with GPS localities (SW 24.629, -94.855, NE 38.017, -77.004), including Florida, Georgia, North Carolina, South Carolina, Tennessee, Kentucky, Alabama, Louisiana, Mississippi and parts of eastern Texas and southern Virginia) to keep all occurrences focused within a single flora. In addition, our approach helped to minimize taxonomic discrepancies caused by differing taxonomic opinions, as Weakley's Flora of the Southeastern U.S. [45] is the most current reference, and is most comparable to the taxonomy that iNaturalist uses as the authority for vascular plants (Plants of the World Online) [17, 46, 47]. Previous assessments of bias and misidentification in participatory science data [48–50] have led us to hypothesize that the data quality of iNaturalist Research Grade observations will be substantially lower than for digitized herbarium specimens, with iNaturalist showing higher levels of taxonomic misidentification. We also hypothesize that there will be more observational bias towards common or visually charismatic plants and less evenness of observations in iNaturalist. Conversely, we

expect to see a more evenly distributed representation of species in digitized herbarium collections.

## Methods

### “Identifiability by image” and focal family selection

The decision to investigate solely flowering plants was largely for the purpose of assessing taxa with differing levels of what we are describing here as “identifiability by image.” “Identifiability by image” refers to the accessibility of crucial structures for species-level identification to the average observer. In flowering plants, this most often means the prominence of reproductive structures when looking at the plant as a whole. This emphasis on reproductive characters ties into phenology, flowering time, and the taxonomic splitting of the group of plants at hand. For example, angiosperm families mainly composed of species with showy flowers are more likely to be collected/photographed and have enough information pictured or collected to be able to make a confident species identification than groups with inconspicuous flowers [51, 52]. In contrast, it is expected that families for which species delimitations often require fine-scale morphology, such as seed or trichome features, would be less likely to be photographed adequately for species identification [20]. Study of the biases regarding which kinds of plants are most photographed on iNaturalist and how this compares to what is most often represented in herbaria should be investigated further to fully understand the extent of these patterns. Here, we address the issue of “identifiability by image” solely as a means of selecting angiosperm families for further study. We view “identifiability by image” as a spectrum that may be observed for any given family or at any taxonomic level, and this concept has been explored previously in arthropod taxa [53]. A more comprehensive understanding of how groups vary in their ability to be identified by image is important in developing an understanding of the extent to which platforms such as iNaturalist can be used effectively in research, or to what extent digitized herbarium specimens can be used detached from their physically preserved specimens.

In our attempt to quantify this spectrum of “identifiability by image”, the iNaturalist identification process was used as a proxy, as iNaturalist specimens are only ever identified by available image and locality data. A dataset of all angiosperm iNaturalist observations available on December 31, 2021 from the southeastern U.S. was downloaded. The number of “Research Grade” and “Needs ID” iNaturalist records for each plant family was stored, and we first filtered out families that contained fewer than 500 Research Grade observations. Ten flowering plant families were then selected along a spectrum of 30% Research Grade to 85% Research Grade/Total observations to capture the spectrum of identification, using percentage Research Grade identification as a proxy for ease of “identifiability by image” (Fig 1).

### Occurrence download

Occurrence data for each of the ten selected families within the region covered by Weakley’s Flora [16] were downloaded using the iDigBio online portal (<https://www.idigbio.org/portal/search>) and from only Research-Grade observations via the iNaturalist “export observations” portal (<https://www.inaturalist.org/observations/export>). iNaturalist data were downloaded using the online export tool as opposed to isolating Research-Grade iNaturalist records from GBIF due to the more detailed data available (including identifier name, initial taxonomic identification, time until Research-Grade identification, whether the species is captive or cultivated, etc.). Names of species were only retained in the iDigBio dataset if those names were also present in the Plants of the World Online [46], the accepted taxonomic framework used by iNaturalist for vascular plants. This was done to reduce taxonomic discrepancies caused by

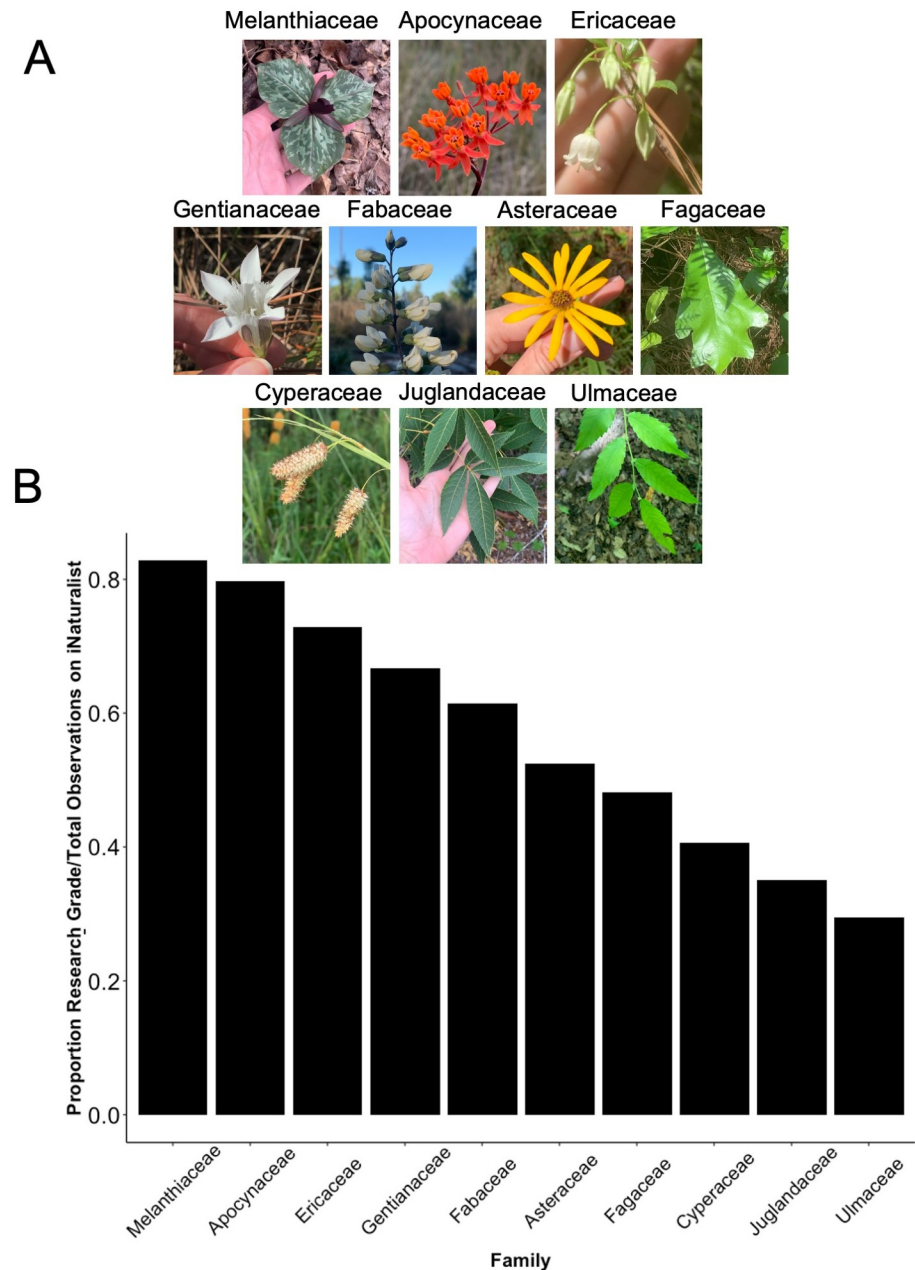

**Fig 1. Identifiability by image and focal families.** A. Representative images of each family included in this study. B. Selected angiosperm families based on proportion of Research-Grade/total observations on iNaturalist in the southeastern United States as a proxy for ease of “identifiability by image”/charisma. Images by Elizabeth White.

<https://doi.org/10.1371/journal.pone.0295298.g001>

outdated taxonomy, which is likely to be more prevalent in natural history collections and distracts from the question of data quality comparison in these two groups [54–57]. Images were first extracted from each occurrence record via associated image URLs found in iNaturalist and iDigBio occurrence downloads, and the associated taxonomic name was saved as the image file name. In the case of iNaturalist specimens identified as “Unsure” in the first pass of

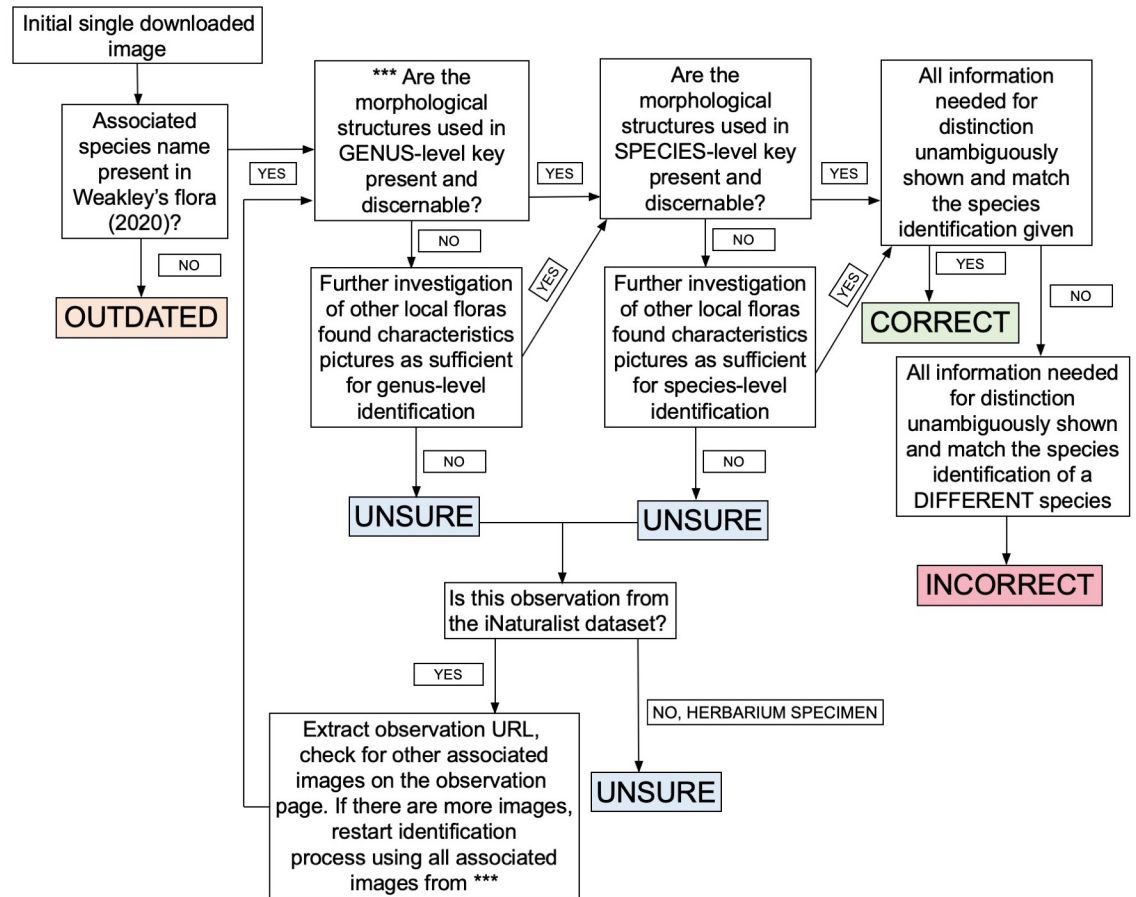

**Fig 2. Decision tree/rubric for identification of digitized herbarium specimen images and iNaturalist photographs.** Asterisks refer to other local floras used in “Unsure” specimens/observation delineation include Wunderlin [58], Wofford [59], and Barkworth [60].

<https://doi.org/10.1371/journal.pone.0295298.g002>

image identification, an additional round of identification occurred which included accessing each observation via URL to assess all associated images (Fig 2).

### Scoring images/identification calibration

Five hundred observations or records were randomly selected from each respective iNaturalist or iDigBio family data file using base functions within RStudio, resulting in 1000 specimens and Research-Grade iNaturalist observations for each of the 10 selected families. Associated images from all observations/specimens were downloaded and stored in folders by family and data type (“herbarium” or “inat”) to be scored using the image scoring software ImageAnt (<https://gitlab.com/stuckyb/imageant>). ImageAnt is an interface that allows each image in a folder to be assessed, displaying the image filename, the image itself, and a predetermined scoring system to be shown all at the same time, which allows images to be assigned scores quickly and stores score data to be easily analyzed in the future. In this case, the categories “Taxonomically Correct”, “Taxonomically Incorrect”, “Unsure”, “Outdated Taxonomy”, and “Flag” were used (Flag was rarely used and was applied to images in which the download did not work and an incorrect image was downloaded, to be revisited and corrected later), and

each unique image set associated with an individual observation was independently identified according to the dichotomous keys found in Weakley's Flora [16] and compared to the image filename that included the species determination given to the specimen or iNaturalist observation, to put each image in one of the aforementioned categories. It should be noted that a key distinction between the vast majority of digitized herbarium specimens is that they are associated with one downloadable image, whereas each iNaturalist observation is more often associated with multiple images. A representative image from each iNaturalist observation was initially used in identification scoring, and in cases in which there was not enough information pictured in the single downloaded iNaturalist image, the observation was marked as "Unsure", and then observation URLs were extracted for each observation. Identifications were manually scored based on the set of all images associated with the observation (Fig 2).

Taxonomic identification was calibrated using a group of expert botanists and taxonomists who were assigned the same group of images at the beginning of the project, to come to a consensus of what constitutes an "Unsure" image, the most ambiguous and subjective scoring category. It was decided that images with no reproductive structures pictured and that also had no mention of leaf characteristics in the family's available dichotomous keys would be marked in the "Unsure" category. After this identification framework was created and identifications were calibrated, downloaded images were scored using Weakley's Flora and our developed identification framework (Fig 2).

## Statistical methods

After all images were scored, "Correct" and "Unsure" identifications were summed for each data type, and a two-proportions Z-test was run using the stats package in R for each to determine the effect of data type (iNaturalist or Herbarium) on taxonomic identification. Further nuance on the inclusion or omission of the "Outdated" category is discussed further below.

To test the extent of variation in error rates across taxonomic groups, we fit two separate binomial general linear models (one GLM for iNaturalist and one for digitized herbarium records) with correct versus incorrect as response, and family as a covariate. We compared the model with family as a covariate to an intercept only model, and used an ANOVA analysis to test the importance of family as a predictor. Visualization of statistical models was constructed using the R packages sjPlot and ggPlot [61, 62].

To test coefficient of variance as a metric of evenness in observation per species in the iNaturalist and herbarium datasets, we used the dplyr package in R to create a vector of "counts" for how many times each species was observed in the entire data download for each data type [63]. Then, we used the stats package in baseR to calculate mean and standard deviation of each "counts" vector. The coefficient of variance was calculated for each dataset manually in R by dividing the standard deviation by the mean and multiplying by 100.

## Results

### Data type comparison

Two two-proportions Z-tests were run to determine the effect of "data type" (iNaturalist or digitized herbarium specimen) on the frequency of each taxonomic identification. One Z-test was run to determine the effect of data type on the number of "Correct" identifications, and then the same process was followed for the "Unsure" category (Table 1). Data type was significant in predicting whether each observation/specimen was identified correctly ( $p < 0.001$ ), with iNaturalist having higher accuracy overall (iNaturalist proportion Correct = 0.84267, Herbarium proportion Correct = 0.76345). Data type was not significant in how many observations were placed in the "Unsure" taxonomic identification category ( $p = 0.3659$ ), and

**Table 1. Two-proportions Z- test results showing effects of data type on how many observations were placed in the “Correct” or “Unsure” categories (Prop 1: iNaturalist, Prop 2: Herbarium).**

|           | Two proportion Z- test results: Difference of each score category between iNaturalist and digitized herbarium images |                  |                         |
|-----------|----------------------------------------------------------------------------------------------------------------------|------------------|-------------------------|
|           | p                                                                                                                    | Sample estimates | 95% confidence interval |
| Correct   | 2.2e-16 ***                                                                                                          | Prop 1: 0.84267  | 0.06274777              |
|           |                                                                                                                      | Prop 2: 0.76345  | 0.09569363              |
| Unsure    | 0.3                                                                                                                  | Prop 1: 0.13851  | -0.02126412             |
|           |                                                                                                                      | Prop 2: 0.14530  | 0.007691451             |
| Outdated  | 2.2e-16 ***                                                                                                          | Prop 1: 0.00578  | -0.04017332             |
|           |                                                                                                                      | Prop 2: 0.03921  | -0.02669221             |
| Incorrect | 2.2e-9 ***                                                                                                           | Prop 1: 0.01334  | -0.02646847             |
|           |                                                                                                                      | Prop 2: 0.03302  | -0.01288861             |

<https://doi.org/10.1371/journal.pone.0295298.t001>

digitized herbarium images were placed in this category at a higher frequency than scored iNaturalist images (iNaturalist proportion Unsure = 0.13851, Herbarium proportion Unsure = 0.14530). There were 113 cases in which iNaturalist observations were initially scored as “Unsure” and were then changed to a different category after assessment of all images associated with the observation URL (see [S1 Dataset](#)). Data type was also significant in predicting how many observations were placed in the “Outdated” and “Incorrect” categories, although in both cases the number of observations in these categories were comparatively low ([Fig 3](#), [Table 1](#)).

**Between-family analysis (General Linear Models).** Results of the GLM analyses showed that plant family had a significant effect on the accuracy of taxonomic identification. In both cases, the model with family is significantly better than an intercept-only model ( $p < 2.2 \times 10^{-16}$  in all cases, [Table 2](#)). This pattern is strongly driven by the high proportion of the family “Cyperaceae” being scored as “Unsure”, creating a low proportion of “Correct” identifications in Cyperaceae in both data types ([Fig 4](#)). We also plot “Correct”, “Incorrect”, “Outdated”, and “Unsure” by family in [Fig 3](#) to visually summarize those distributions.

### Analysis of evenness of species representation/observation number (coefficient of variance)

Results of an analysis of coefficients of variance on the total dataset of all plant observations and specimens from the 10 selected families and within the study area (409,636 iNaturalist records, 194,662 digitized herbarium records), showed that iNaturalist had higher variance (332.32%) when accounting for the mean number of observations per species than digitized herbarium specimens (181.22%). The number of observations per species in the digitized herbaria dataset is more centralized around the mean (64.82), whereas iNaturalist observations are less evenly centered around the mean number of observations per species (152.77). This result further suggests more evenness of observation in the digitized herbarium dataset and generally large peaks in observations of a few species in the iNaturalist dataset ([Fig 5](#)).

## Discussion

We show that there are some modest differences in the proportion of correctly identified specimens between iNaturalist Research-Grade observations and digitized images of herbarium specimens across flowering plants in the southeastern U.S. for the families investigated, which



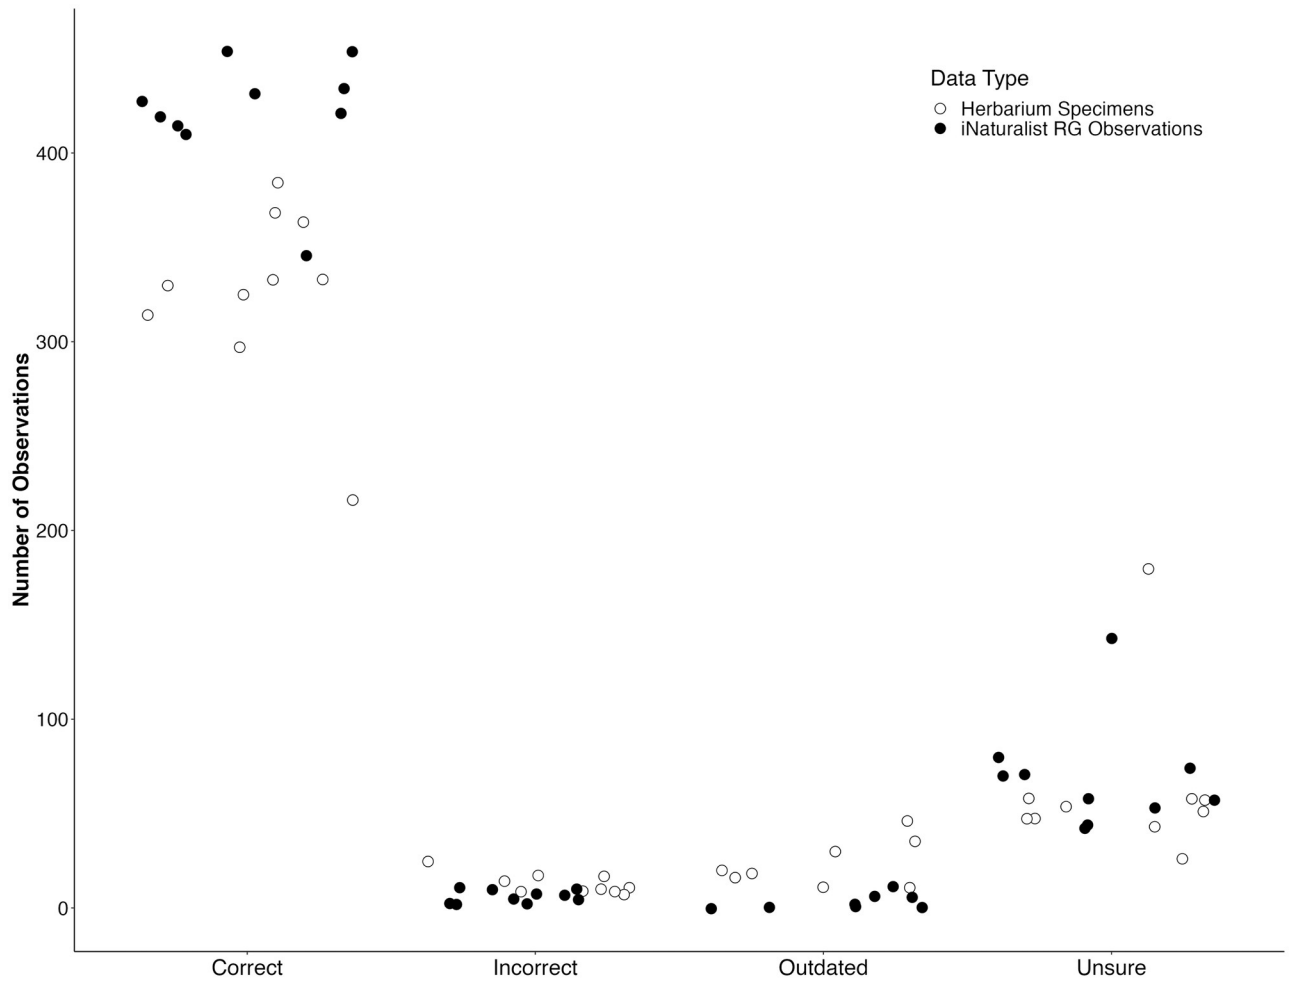

**Fig 3.** Total number of Correct, Incorrect, Outdated, and Unsure taxonomic identifications for digitized herbarium specimens (white dots) and iNaturalist (black dots). Each dot represents a sampled plant family.

<https://doi.org/10.1371/journal.pone.0295298.g003>

are largely representative of the diversity in angiosperm families. In general, iNaturalist Research-Grade specimens have slightly greater odds of being identified correctly compared to digitized herbarium specimens. However, different identification processes for the two types of data may affect identification accuracy and bias.

**Table 2.** ANOVA family-level results. Testing General Linear Models against null models to determine family effect on taxonomic identification.

|                                                                          | Residual df | Dev df | Pr(*<0.05)    |
|--------------------------------------------------------------------------|-------------|--------|---------------|
| <b>Model 1:</b><br>iNaturalist taxonomic identification ~ Family         | 4952        | 4107.9 | p < 0.001 *** |
| <b>Model 2:</b><br>Digitized Herbarium taxonomic identification ~ Family | 4002        | 3645.7 | p < 0.001 *** |

<https://doi.org/10.1371/journal.pone.0295298.t002>

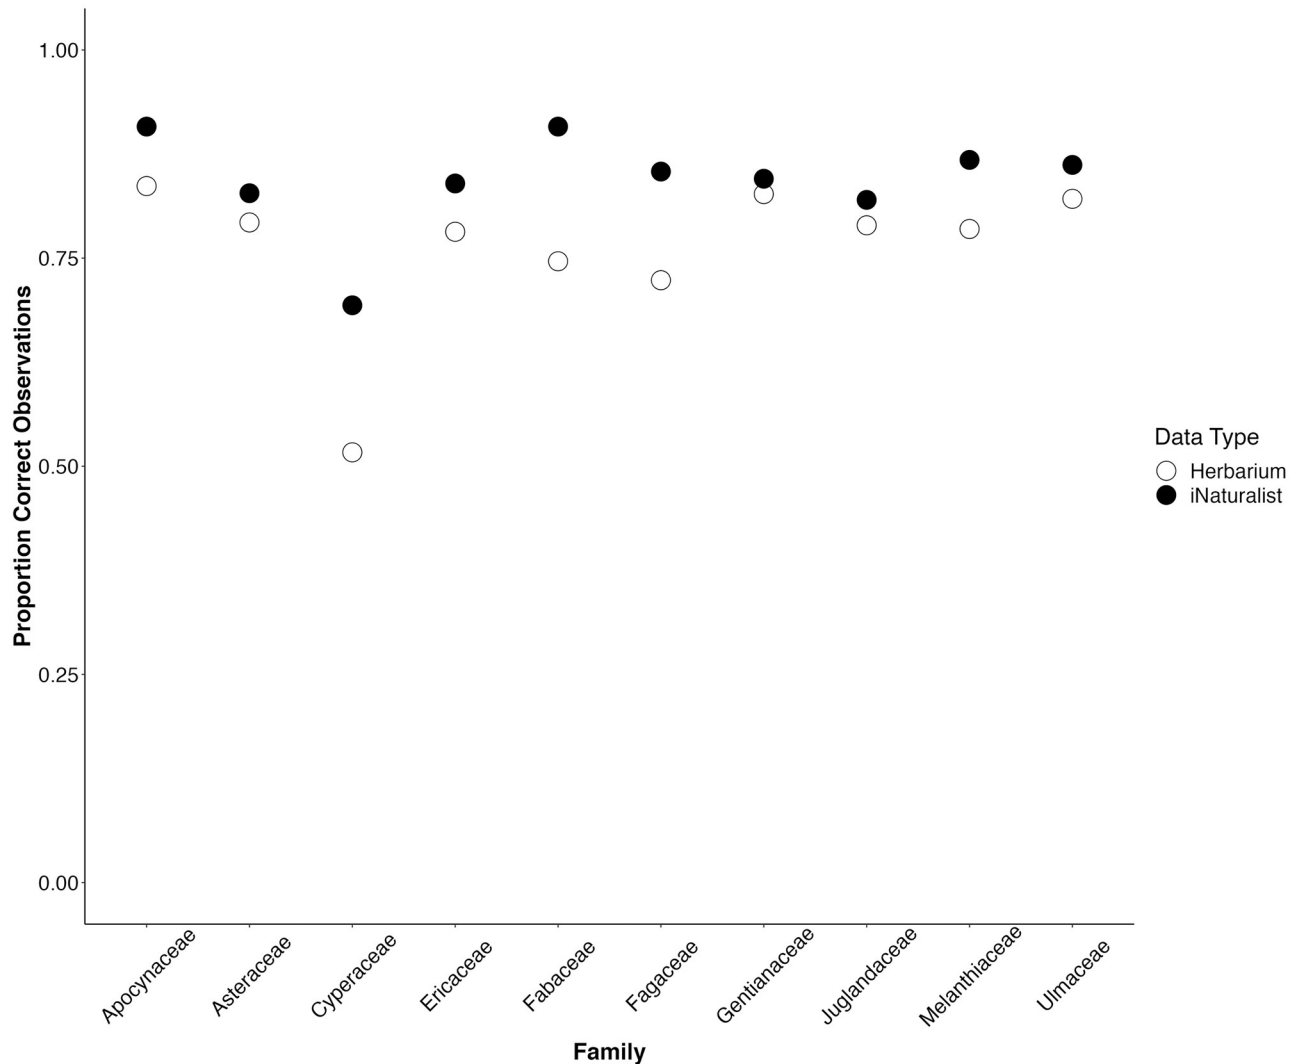

**Fig 4. Proportion Correct identifications across families for digitized herbarium specimens and iNaturalist.** Dots represent the correct number of correctly identified observations divided by the total number of observations downloaded per family (500).

<https://doi.org/10.1371/journal.pone.0295298.g004>

### Caveat: Use of digitized herbarium specimens

Both herbarium specimen images and iNaturalist images are ultimately tied back to collecting events. At the time of collection, identifications are often made based on observation of the physical organism, and therefore identification may include information that is not captured on images available to digital data users. This should be kept in mind in the context of interpretation of this study's results. We still see value in the comparisons here, both to assess quality based on available evidence from images, and to better understand how these types of data can be comprehensively and effectively combined by the common factors that unite them, their identification to comparable taxa and their availability as digital objects.

The decision to analyze digitized herbarium specimens as opposed to physical herbarium specimens was for the reasons of ease of data accessibility and framing of the questions at hand. Given that we were looking at the utility and behavior of images as a taxonomic tool and

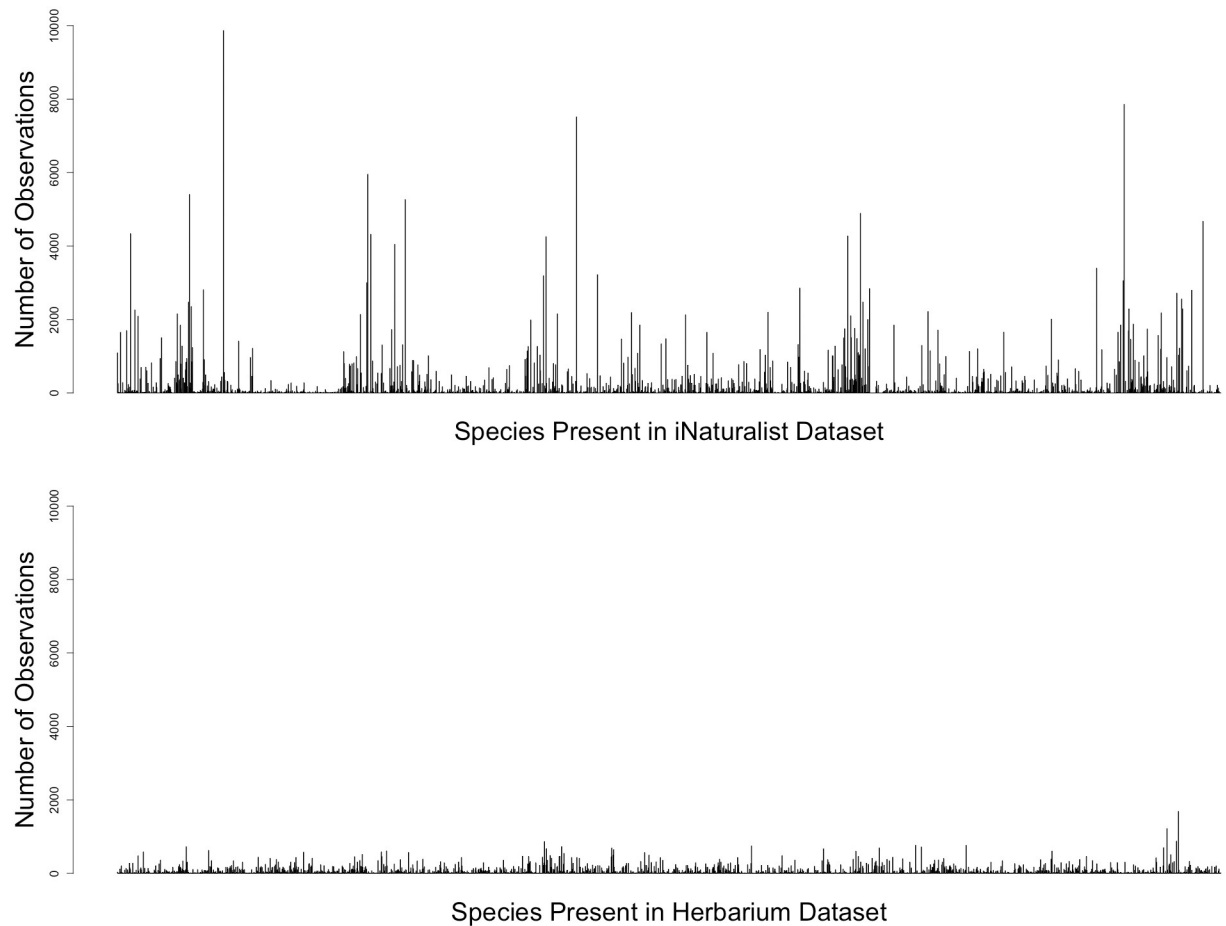

**Fig 5. Histograms showing distribution of number of observations for each species across all families in this downloaded dataset.** iNaturalist (n = 2676 species) (above) and digitized herbarium specimens (n = 2468 species) (below).

<https://doi.org/10.1371/journal.pone.0295298.g005>

the limits of imaging plants as a medium, the inclusion of physical museum specimens would not be testing the same phenomena as the iNaturalist observations. Digitized specimens are also standardized in their format, which brings advantages and disadvantages: the results of this study point to the utility of the freedom that iNaturalist observers have to upload multiple images of morphological structures all associated with the same observation, whereas a digitized herbarium specimen is nearly always only one image. This would not be the case with physical herbarium specimens that one could examine in otherwise fine detail (although certain morphological characters may be lost or degraded through pressing, drying, and mounting).

The “Unsure” category includes two different phenomena: 1) images that provided little to no information for identification past the family or genus level due to degradation of the specimen or poor image quality, and 2) images of species that require fine-scale morphology, chemistry, or chromosome number to distinguish among species (Fig 2). Here, we treated both types similarly, but the distinction is worth noting when thinking about the implications of this concept of “identifiability by image”, as there is a difference between issues that arise by identifying organisms when only images are available as compared to the issues that relate more to the standardization of images being used for identification, as some taxonomic groups

require more detailed images than others and some distinguishing characters by definition (as in the case of chemistry or chromosome number) cannot be imaged.

The results for digitized herbarium specimens of Cyperaceae imply a more prevalent issue of the limits of the standardized herbarium digitization protocols used today. The results of this study call for incorporation of the extended specimen protocol into standardized digitization efforts (including close-up or microscope images where appropriate) when of particular relevance to identification. iNaturalist provides more flexibility for those users with prior knowledge of a particular taxonomic group by allowing them to provide more detailed images (although this does not happen frequently enough, as quantified by McMullin [20]). Still, iNaturalist observations used in this study did include microscope or magnified images of distinguishing characters, hence the higher proportion of Correct scorings for iNaturalist than digitized herbarium specimens for taxonomically complex families such as Cyperaceae. Although multiple images of a herbarium specimen can often be accommodated by the database structure, standard digitization protocols nearly always capture only a single image of the entire specimen, and although some images are of sufficient quality for zoomable close-ups, multiple images, including close-ups, are rarely available [64–66]. This practice, and the ensuing results, also stress the importance of the availability, accessibility, and preservation of the physical specimens in natural history collections, as some groups of organisms do not lend themselves to the identified-by-image-only system.

### Identification accuracy

A main difference in these two types of data is the overall standardization of both the intake and identification processes in iNaturalist relative to herbarium specimens. With iNaturalist, photographs are submitted to the platform by participatory scientists, and all photographs are then open for other iNaturalist users to help refine initial identifications or make other annotations that increase the utility of the photograph for research value. In contrast, images of herbarium specimens come from multiple sources via multiple platforms that use diverse pipelines. For example, the download of data from iDigBio (or any other data aggregator) could be biased due to lags in herbarium digitization efforts and upload time to the iDigBio database from individual herbaria.

In addition, taxonomic discrepancies and outdated taxonomy are major setbacks to the standardization of herbarium data from multiple institutions and even potentially within a single collection. Objects (digital or physical) that have not been recently reassessed are more likely to be represented in herbarium data, and this issue lends itself to problems of synonymy. By contrast, a single, consistently updated taxonomic backbone underlies iNaturalist. This standardization means that issues with synonymy are much less common in iNaturalist.

Caution should be exercised when using iNaturalist Research-Grade data without ample distinguishing characters pictured, specifically for species identifications that require fine-scale morphology (e.g., Cyperaceae, Poaceae, many bryophytes). It should be noted, however, that iNaturalist is a platform in which anyone can identify images, and identifiers are experts in their respective fields, whether classically trained taxonomists or extremely knowledgeable and experienced participatory scientists who have an intimate understanding of certain groups of organisms [43, 67]. Even in cases when only images are available, it is possible in the future that computer vision or comparable image recognition software would be able to make accurate predictions based on other characters in images that may not be able to be picked up by someone using a traditional flora, if enough high-quality identifications already exist for the group and are informing the given identification software. This requires further investigation

in the future, as the Research-Grade identification process on iNaturalist heavily relies on user identifications as it stands today [43].

### Differences in process and bias

Computer vision has significantly altered the process of observation and identification in iNaturalist [68]). For iNaturalist users who have no prior knowledge of the taxonomic group they are posting, the computer vision-generated identification is likely what the initial, (non-Research-Grade) identification will be associated with. Many concerns with identification accuracy come from this part of the identification process, implying that identifiers on iNaturalist are more likely to accept an erroneous AI-generated identification than a trained expert doing the identifying in a natural history museum, particularly in more difficult-to-identify groups or groups of species that are variable in the morphology. However, recent work shows that computer vision may have less impact on downstream identification processes—past the initial observation—than has been assumed, and generally that the computer vision framework has been shown to have significant utility in reducing the time it takes to get to Research Grade when used for the first identification associated with an iNaturalist observation [43].

Our results also indicate an overrepresentation of species based on relative abundance and charisma. Members of Cyperaceae are better represented in the digitized herbarium dataset than in iNaturalist in the southeastern U.S., but in all other families, iNaturalist has more observations than what is available as imaged specimens in digitized herbaria. A search of the family “Cyperaceae” on the iDigBio portal for the study area in October 2023 showed 12,848 records present that did not have media attached, meaning that they exist in the collection but the specimen has not been imaged. Although iNaturalist has a higher abundance of observations overall than what is available in the digitized herbarium specimen dataset for the southeastern U.S. for the subset of families selected (409,636 observations in the iNaturalist dataset vs. 194,662 in the herbarium dataset), the iNaturalist data are less evenly distributed across species and generally have large peaks of observations in common species. Species that are common in disturbed areas such as lawns, ditches, or landscaped areas tend to have a much higher proportion of observations than other plant species (as is the case for *Bidens alba* in this dataset, which can be seen as the large peak in the upper panel of Fig 5). Similarly, in taxonomic groups (whether that be families or genera) that are generally difficult to identify by image, such as Cyperaceae, the vast majority of iNaturalist observations are centered around species that are particularly showy and that have large bracts or colorful reproductive structures (as is the case in the southeastern U.S. with *Rhynchospora colorata*), whereas in the digitized herbarium specimen dataset, more diverse and cryptic genera are more commonly represented (*Carex*).

### Implications for future research and a framework for future use

The use of iNaturalist data in biodiversity research is a promising field with the potential to become a massive source of occurrence data. Nonetheless, a better understanding of the identification process, as well as the biology of the organisms being examined with this kind of big data, should be taken into account more directly when considering data sources in large-scale biodiversity analyses. Caution should be exercised in the use of species occurrences based on images alone in groups that require fine-scale morphology, chemistry, chromosome number, etc. to make species-level identifications; this situation requires some a priori understanding of the biology and taxonomy of the group at hand. Ultimately, further studies of error and bias in species identification, building on this study and encompassing more families in a wider geographic scope, will be useful in capturing possible patterns of misidentification and bias of

iNaturalist data more broadly. However, the results of this study reinforce the quality and accuracy of participatory science data to be used at large scales alongside occurrence data acquired from natural history collections.

## Supporting information

**S1 Dataset. Changed “Unsure” observations.** List of iNaturalist observation URLs which were changed from “Unsure” to another identification category after assessing all associated images.  
(XLSX)

## Acknowledgments

We thank Caitlin Campbell and Vijay Barve for helping with the aggregation of the large iNaturalist data downloads used in this study for family selection. We also thank those at iNaturalist and iDigBio for making these data accessible and usable at this scale. We acknowledge and thank the community of expert botanist identifiers on iNaturalist and herbarium staff in the southeastern U.S. for contributing to the data downloaded and reviewed in this study. We additionally thank those who are a part of the BiotaPhy project for comments and support throughout this project.

## Author Contributions

**Conceptualization:** Elizabeth White, Pamela S. Soltis, Douglas E. Soltis, Robert Guralnick.

**Data curation:** Elizabeth White, Robert Guralnick.

**Formal analysis:** Elizabeth White, Robert Guralnick.

**Investigation:** Elizabeth White, Robert Guralnick.

**Methodology:** Elizabeth White, Pamela S. Soltis, Douglas E. Soltis, Robert Guralnick.

**Project administration:** Elizabeth White, Pamela S. Soltis, Douglas E. Soltis.

**Resources:** Pamela S. Soltis, Douglas E. Soltis, Robert Guralnick.

**Supervision:** Pamela S. Soltis, Douglas E. Soltis, Robert Guralnick.

**Validation:** Douglas E. Soltis.

**Visualization:** Elizabeth White, Robert Guralnick.

**Writing – original draft:** Elizabeth White.

**Writing – review & editing:** Elizabeth White, Pamela S. Soltis, Douglas E. Soltis, Robert Guralnick.

## References

1. Di Cecco GJ, Barve V, Belitz MW, Stucky BJ, Guralnick RP, Hurlbert AH. Observing the observers: how participants contribute data to iNaturalist and implications for biodiversity science. *BioScience*. 2021; 71(11):1179–88.
2. Alarcon Ferrari C, Jönsson M, Gebreyohannis Gebrehiwot S, Chiwona-Karltun L, Mark-Herbert C, Manushevich D, et al. Citizen science as democratic innovation that renews environmental monitoring and assessment for the sustainable development goals in rural areas. *Sustainability*. 2021; 13:2762.
3. Mesaglio T, Callaghan CT. An overview of the history, current contributions and future outlook of iNaturalist in Australia. *Wildlife Research*. 2021; 48:289–303.

4. Van Horn G, Aodha OM, Song Y, Cui Y, Sun C, Shepard A, et al. The iNaturalist species classification and detection dataset. *Proceedings of the IEEE Conference on Computer Vision and Pattern Recognition (CVPR)*. 2018:8769–8778.
5. Laport RG, Brookover ZS, Christman BD, Julienne NG, Phillely K, Craddock JH. Environmental niche and demographic modeling of American chestnut near its southwestern range limit. *The American Midland Naturalist*. 2022 Oct; 188(2):137–76.
6. Callaghan CT, Ozeroff I, Hitchcock C, Chandler M. Capitalizing on opportunistic citizen science data to monitor urban biodiversity: a multi-taxa framework. *Biological Conservation*. 2020; 251.
7. Barve VV, Brenskelle L, Li D, Stucky BJ, Barve NV, Hantak MM, et al. Methods for broad-scale plant phenology assessments using citizen scientists' photographs. *Applications in Plant Sciences* 2020: 8.
8. Taylor SD, Meiners JM., Riemer K, Orr MC, White EP. Comparison of large-scale citizen science data and long-term study data for phenology modeling. *Ecology*. 2019; 100(2):e02568. <https://doi.org/10.1002/ecy.2568> PMID: 30499218
9. Aceves-Bueno E, Adeleye AS, Feraud M, Huang Y, Tao M, Yang Y, et al. The accuracy of citizen science data: a quantitative review. *The Bulletin of the Ecological Society of America*. 2017; 98:278–90.
10. Courter JR., Johnson RJ, Stuyck CM, Lang BA, Kaiser EW. Weekend bias in citizen science data reporting: Implications for phenology studies. *International Journal of Biometeorology*. 2013; 57:715–20. <https://doi.org/10.1007/s00484-012-0598-7> PMID: 23104424
11. Durso AM, de Castañeda RR, Montalcini C, Mondardini MR, Fernandez-Marques JL, Grey F, et al. Citizen science and online data: opportunities and challenges for snake ecology and action against snakebite. *Toxicon*. 2021:9–10. <https://doi.org/10.1016/j.toxcx.2021.100071> PMID: 34278294
12. Steen VA, Elphick CS, Tingley MW. An evaluation of stringent filtering to improve species distribution models from citizen science data. *Diversity and Distributions*. 2019; 25(12):1857–69.
13. Hochmair HH, Scheffrahn RH, Basille M, Boone M. Evaluating the data quality of iNaturalist termite records. *PLoS One*. 2020; 15(5):e0226534. <https://doi.org/10.1371/journal.pone.0226534> PMID: 32365126
14. GBIF: The Global Biodiversity Information Facility: What is GBIF?. [Internet]. Copenhagen. [updated 2020 Jan, cited 2023 Mar 20] <https://www.gbif.org/what-is-gbif>.
15. Li E, Parker SS, Pauly GB, Randall JM, Brown BV, Cohen BS. An urban biodiversity assessment framework that combines an urban habitat classification scheme and citizen science data. *Frontiers in Ecology and Evolution*. 2019 Jul 17; 7:277.
16. Franz N, Gilbert E, Ludäscher B, Weakley A. Controlling the taxonomic variable: Taxonomic concept resolution for a southeastern United States herbarium portal. *Research Ideas and Outcomes*. 2016.
17. Isaac NJB, Strien AJ, August TA, Zeeuw MP, Roy DB. Statistics for citizen science: extracting signals of change from noisy ecological data. *Methods in Ecology and Evolution*. 2014; 10(5):1052–60.
18. Balazs CL, Morello-Frosch R. The three Rs: How community-based participatory research strengthens the rigor, relevance, and reach of science. *Environmental Justice*. 2013 Feb 1; 6(1):9–16. <https://doi.org/10.1089/env.2012.0017> PMID: 24260590
19. Kerson R. Lab for the Environment. *MIT Technology Review*. 1989; 92(1):11–12.
20. McMullin RT, Allen JL. An assessment of data accuracy and best practice recommendations for observations of lichens and other taxonomically difficult taxa on iNaturalist. *Botany*. 2022; 100(6): 491–497.
21. James SA, Soltis PS, Belbin L, Chapman AD, Nelson G, Paul DL, et al. Herbarium data: global biodiversity and societal botanical needs for novel research. *Applications in Plant Sciences*. 2018; 6(2). <https://doi.org/10.1002/aps3.1024> PMID: 29732255
22. Borges LM, Candido Reis V, Izbicki R. Schrödinger's Phenotypes: herbarium specimens show two-dimensional images are both good and (not so) bad sources of morphological data. *Methods in Ecology and Evolution* 2020; 11:1296–1308.
23. Meineke EK, Davies TJ, Daru BH, Davis CC. Biological collections for understanding biodiversity in the Anthropocene. *Phil. Trans. R. Soc*. 2019.
24. Kholia BS, Fraser-Jenkins CR. Misidentification makes scientific publications worthless—save our taxonomy and taxonomists. *Current Science*. 2011; 100(4):458–61.
25. Isaac JB, Pocock MO. Bias and information in biological records: Bias and information in biological records. *Biological Journal of the Linnean Society*. 2015; 115(3):522–31.
26. Davidson RA, Davidson PE. Variance in herbarium specimen identification and other considerations based upon the preparation of a local flora. *Rhodora*. 2022; 9.
27. Boakes EH, McGowan PJK, Fuller RA, Chang-qing D, Clark NE, O'Connor K, et al. Distorted views of biodiversity: Spatial and temporal bias in species occurrence data. *PLoS Biology* 2010; 8. <https://doi.org/10.1371/journal.pbio.1000385> PMID: 20532234

28. Guralnick R, Van Cleve J. Strengths and weaknesses of museum and national survey data sets for predicting regional species richness: comparative and combined approaches. *Diversity and Distributions*. 2005 Jul; 11(4):349–59.
29. Sastre P, Lobo JM. Taxonomist survey biases and the unveiling of biodiversity patterns. *Biological Conservation*. 2009 Feb 1; 142(2):462–7.
30. Crisci JV, Katinas L, Apodaca MJ, Hoch PC. The end of botany. *Trends in Plant Science*. 2020 Dec 1; 25(12):1173–6. <https://doi.org/10.1016/j.tplants.2020.09.012> PMID: 33046371
31. Prather LA, Alvarez-Fuentes O, Mayfield MH, Ferguson CJ. The decline of plant collecting in the United States: a threat to the infrastructure of biodiversity studies. *Systematic Botany*. 2004 Jan 1; 29(1):15–28.
32. Matsunaga, Thompson AA, Figueiredo RJ, Germain-Aubrey CC, Collins M, Beaman RS, et al. A Computational- and Storage-Cloud for Integration of Biodiversity Collections. 2013. Proceedings of the 2013 IEEE 9th International Conference on e-Science, Beijing, China. 78–87.
33. Page LM, MacFadden BJ, Fortes JA, Soltis PS, Riccardi G. Digitization of Biodiversity Collections Reveals Biggest Data on Biodiversity. *BioScience*. 2015. 65: 841–842.
34. iDigBio [Internet]; c2013. 2023 Oct 10 [cited 2023 Oct 15]; <https://idigbio.org>
35. Yost JM, Sweeney PW, Gilbert E, Nelson G, Guralnick R, Gallinat AS, et al. Digitization protocol for scoring reproductive phenology from herbarium specimens of seed plants. *Applications in Plant Sciences*. 2018 Feb; 6(2):e1022. <https://doi.org/10.1002/aps3.1022> PMID: 29732253
36. Mata-Montero, E, Carranza-Rojas J. Automated plant species identification: Challenges and opportunities. *WITFOR. IFIP Advances in Information and Communication Technology*, 2016;481.
37. Carranza-Rojas J, Goeau H, Bonnet P, Mata-Montero E, Joly A. Going deeper in the automated identification of Herbarium specimens. *BMC Evol Biol* 17, 181 (2017). <https://doi.org/10.1186/s12862-017-1014-z> PMID: 28797242
38. Figueroa-Mata G, Mata-Montero E, Valverde-Otárola JC, Arias-Aguilar D, Zamora-Villalobos N. Using deep learning to identify Costa Rican native tree species from wood cut images. *Front. Plant Sci*. 2022; 13:789227. <https://doi.org/10.3389/fpls.2022.789227> PMID: 35432415
39. Weaver WN, Ng J, Laport RG. LeafMachine: Using machine learning to automate leaf trait extraction from digitized herbarium specimens. *Applications in Plant Sciences*. 2020 Jun; 8(6):e11367. <https://doi.org/10.1002/aps3.11367> PMID: 32626609
40. Weaver WN, Smith SA. 2023. From leaves to labels: Building modular machine learning networks for rapid herbarium specimen analysis with LeafMachine2. *Applications in Plant Sciences* 11(5): e11548. <https://doi.org/10.1002/aps3.11548> PMID: 37915430
41. Goodwin ZA, Harris DJ, Filer D, Wood JR, Scotland RW. Widespread mistaken identity in tropical plant collections. *Current Biology*. 2015 Nov 16; 25(22):R1066–7. <https://doi.org/10.1016/j.cub.2015.10.002> PMID: 26583892
42. Gaier AG, Resasco J. Does adding community science observations to museum records improve distribution modeling of a rare endemic plant? *Ecosphere*. 2023 Mar 23; 14(3)e4419.
43. Campbell C, Barve N, Belitz M, White E, Doby J, et al. Identifying the Identifiers: How iNaturalist facilitates collaborative, research-relevant data generation and why it matters for biodiversity science. *BioScience*. 2023 Jul. 73(7):533–541.
44. Unger S, Rollins M, Tietz A, Dumais H. iNaturalist as an engaging tool for identifying organisms in outdoor activities. *Journal of Biological Education*. 2020 Mar 15. 55(5), 537–547.
45. Weakley AS. 2021. *Flora of the southeastern United States*. University of North Carolina Herbarium, North Carolina Botanical Garden, Chapel Hill, NC.
46. POWO. 2023. "Plants of the World Online. Facilitated by the Royal Botanic Gardens, Kew. Published on the Internet; <http://www.plantsoftheworldonline.org>."
47. iNaturalist. Taxonomy details for Kingdom Plantae (Plants) [Internet]. Los Angeles: iNaturalist open source software. [updated 2021 Nov, cited 2023 Mar 20]. [https://www.inaturalist.org/taxa/47126/taxonomy\\_details](https://www.inaturalist.org/taxa/47126/taxonomy_details).
48. Jaskuła R, Kolanowska M, Michalski M, Schwerk A. From phenology and habitat preferences to climate change: Importance of citizen science in studying insect ecology in the continental scale with American Red Flat Bark Beetle, *Cucujus Clavipes*, as a model species. *Insects*. 2018; 12(4):369.
49. Specht H, Lewandowski E. Biased assumptions and oversimplifications in evaluations of citizen science data quality. *The Bulletin of the Ecological Society of America*. 2018; 99(2):251–56.
50. Burgess HK, DeBey LB, Froehlich HE, Schmidt N, Theobald EJ, Ettinger AK, et al. The science of citizen science: exploring barriers to use as a primary research tool. *Biological Conservation*. 2017; 208:113–20.



51. Lavoie C. Biological collections in an ever changing world: Herbaria as tools for biogeographical and environmental studies. *Perspectives in Plant Ecology, Evolution and Systematics*. 2013; 15(1):68–76.
52. Mesaglio T, Sauquet H, Coleman D, Wenk E, Cornwell W. Photographs as an essential biodiversity resource: drivers of gaps in the vascular plant photographic record. *New Phytologist*. 2023 Mar 13. 238, 1685–1694. <https://doi.org/10.1111/nph.18813> PMID: 36913725
53. Mesaglio T, Callaghan CT, Samonte F, Gorta S, Cornwell WK. Recognition and completeness: two key metrics for judging the utility of citizen science data. *Frontiers in Ecology and the Environment*. 2023 May. 21(4):176–174.
54. Raycheva T, Stoyanov K, Randelović V, Uzundzhaliyeva K, Marinov J, Trifonov V. Overview of the floristic and taxonomic studies on Iridaceae in Bulgaria. *Thaiszia Journal of Botany*. 2021; 31(1):87–104.
55. Freitas TM, Montag L, De Marco FA, Hortal J. How reliable are species identifications in biodiversity big data? Evaluating the records of a neotropical fish family in online repositories. *Systematics and Biodiversity*. 2020; 18: 181–191. <https://doi.org/10.1080/14772000.2020.1730>
56. Prothero DR. Garbage in, garbage out: the effects of immature taxonomy on database compilations of North American fossil mammals. *New Mexico Museum of Natural History and Science Bulletin*. 2015; 68: 257–64.
57. Ang Y, Puniamoorthy J, Pont AC, Bartak M, Blanckenhorn WU, Eberhard WG, et al. A plea for digital reference collections and other science-based digitization initiatives in taxonomy: Sepsidnet as exemplar. *Systematic entomology*. 2013 Jul 1; 38: 637–44. <https://doi.org/10.1111/syen.12015>
58. Wunderlin RP, Hansen BF, Franck AR, Essig FB. Atlas of Florida vascular plants. Atlas of Florida vascular plants. 2016.
59. Wofford BE. Guide to the vascular plants of the Blue Ridge. University of Georgia Press; 1989 Aug 1.
60. Barkworth ME, Capels KM, Long S, editors. Flora of North America, North of Mexico. Oxford University Press on Demand; 1993.
61. Wickham H (2016). ggplot2: Elegant Graphics for Data Analysis. Springer-Verlag New York. ISBN 978-3-319-24277-4, <https://ggplot2.tidyverse.org>.
62. Lüdtke D (2023). sjPlot: Data Visualization for Statistics in Social Science. R package version 2.8.15, <https://CRAN.R-project.org/package=sjPlot>.
63. Wickham H, François R, Henry L, Müller K, Vaughan D (2023). dplyr: A Grammar of Data Manipulation. <https://dplyr.tidyverse.org>, <https://github.com/tidyverse/dplyr>.
64. Lendemer J, Barbara T, Monfils A, Zaspel J, Ellwood E, Bentley A. The extended specimen network: a strategy to enhance US biodiversity collections, promote research and education. *Bioscience*. 2020 Jan. 70(1): 23–30. <https://doi.org/10.1093/biosci/biz140> PMID: 31949317
65. Schindel DE, Cook JA. The next generation of natural history collection. *PLOS Biology*. 2018 Jul 16. 16(7): e2006125.
66. Webster MS. The extended specimen: Emerging frontiers in collections-based ornithological research. Boca Raton, FL. CRC Press;2018.
67. Shirey V, Belitz MW, Barve V, Guralnick R. A complete inventory of North American butterfly occurrence data: narrowing data gaps, but increasing bias. *Ecography*. 2021 Apr; 44(4):537–47.
68. Ueda KI. An overview of Computer Vision in iNaturalist. *Biodiversity Information Science and Standards*. 2014 Nov.
